# Supplementary material for: Tuning the fluorescence sensing for Fe3+ ions by using different dipyridyl linkers in pillar-layered metal–organic frameworks
Source: Royal Society of Chemistry journal article supplement (doi:10.1039/d3nj03489e), 2023-11-17
Supplement: d3nj03489e1.pdf [file d3nj03489e1.pdf]

## Electronic Supplementary Information (ESI)

### **Tuning the fluorescence sensing for Fe<sup>3+</sup> ions by using different dipyridyl linkers in pillar-layered metal-organic frameworks**

Yan-E Liu‡, Ye Zhou‡, Xiao-Yu Li, Yao Jun, Qiu-Xia Li, Quan-Qing Xu, Rong-Rong Zhu\* and Ai-Xin Zhu\*

Faculty of Chemistry and Chemical Engineering, Yunnan Normal University, Kunming 650500, China.

‡ These authors contributed equally to this paper.

\* Corresponding author.

E-mail: chemzrr1993@163.com (Rong-Rong Zhu); zaxchem@126.com (Ai-Xin Zhu)

Tel: +86 0871 65941088

## Table of Contents

|                                                                                                                                                                                                                               |          |
|-------------------------------------------------------------------------------------------------------------------------------------------------------------------------------------------------------------------------------|----------|
| <b>Fig. S1</b> PXRD patterns of <b>PL-1</b> , <b>PL-2</b> , and <b>PL-3</b> .....                                                                                                                                             | <b>1</b> |
| <b>Fig. S2</b> Solid-state excitation and emission spectra of ligands and MOFs.....                                                                                                                                           | <b>1</b> |
| <b>Fig. S3</b> The comparison of the luminescence intensities of <b>PL-1</b> , <b>PL-2</b> , and <b>PL-3</b> dispersed in EtOH upon the addition of 400 $\mu$ L of various anions of $\text{Fe}^{3+}$ solutions (10 mM) ..... | <b>2</b> |
| <b>Fig. S4</b> PXRD patterns of <b>PL-1</b> , <b>PL-2</b> , and <b>PL-3</b> after 5 cycles for sensing $\text{Fe}^{3+}$ ions.....                                                                                             | <b>2</b> |
| <b>Fig. S5</b> PXRD patterns of <b>PL-1</b> , <b>PL-2</b> , and <b>PL-3</b> after being soaked in different metal solutions .....                                                                                             | <b>3</b> |
| <b>Fig. S6</b> Photographs of <b>PL-1</b> , <b>PL-2</b> , <b>PL-3</b> and $\text{Fe}^{3+}$ incorporated <b>PL-1</b> , <b>PL-2</b> , <b>PL-3</b> .....                                                                         | <b>3</b> |
| <b>Fig. S7</b> XPS survey and O1s XPS spectra of <b>PL-1</b> , <b>PL-2</b> , and <b>PL-3</b> before and after being immersed in EtOH solutions of $\text{Fe}(\text{NO}_3)_3$ .....                                            | <b>3</b> |
| <b>Fig. S8</b> S2p and N1s XPS spectra of <b>PL-1</b> , <b>PL-2</b> , and <b>PL-3</b> before and after being immersed in EtOH solutions of $\text{Fe}(\text{NO}_3)_3$ .....                                                   | <b>4</b> |
| <b>Fig. S9</b> Excitation spectra of <b>PL-1</b> , <b>PL-2</b> , and <b>PL-3</b> dispersed in EtOH and UV-vis absorption spectrum of $\text{Fe}^{3+}$ ions in EtOH .....                                                      | <b>4</b> |
| <b>Fig. S10</b> Polts of adsorption capacities of $\text{Fe}^{3+}$ ions vs. the adsorption time for <b>PL-1</b> , <b>PL-2</b> , and <b>PL-3</b> .....                                                                         | <b>5</b> |
| <b>Fig. S11</b> Lengths of pillar for <b>PL-1</b> , <b>PL-2</b> , and <b>PL-3</b> .....                                                                                                                                       | <b>5</b> |
| <b>Table S1</b> Summary of the values of $K_{\text{SV}}$ for the fluorescent MOFs used for sensing $\text{Fe}^{3+}$ ions .....                                                                                                | <b>6</b> |
| <b>Table S2</b> List of the structure parameters and $K_{\text{SV}}$ for the pillar-layered MOFs .....                                                                                                                        | <b>7</b> |
| <b>References</b> .....                                                                                                                                                                                                       | <b>7</b> |

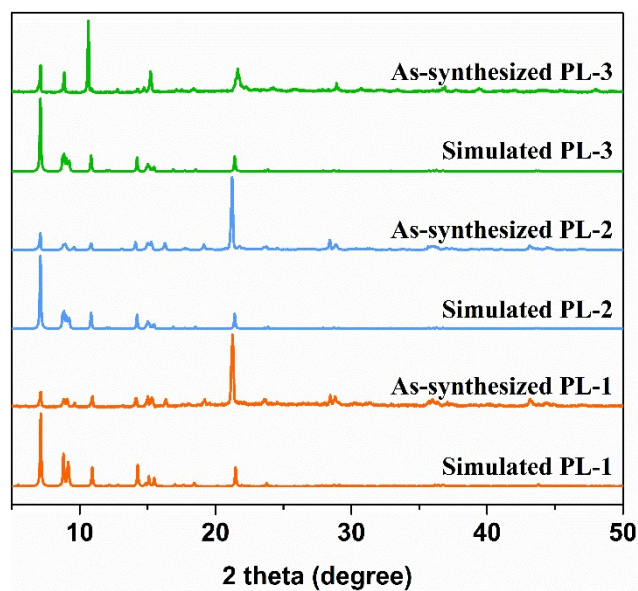

Fig. S1 PXRD patterns of PL-1, PL-2, and PL-3.

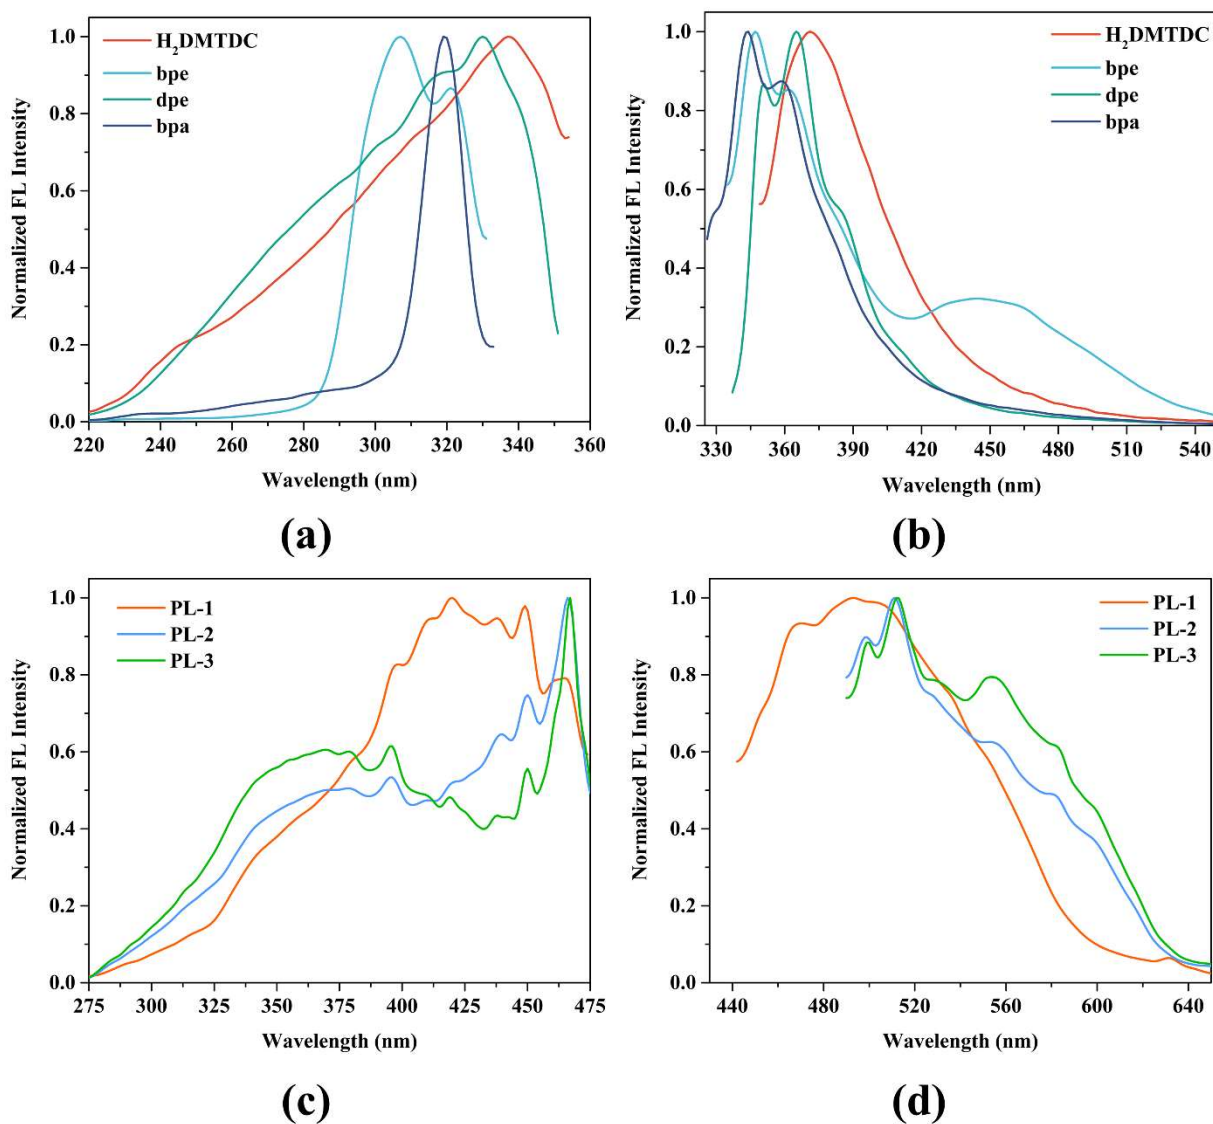

Fig. S2 Solid-state excitation (a, c) and emission (b, d) spectra of ligands and MOFs.

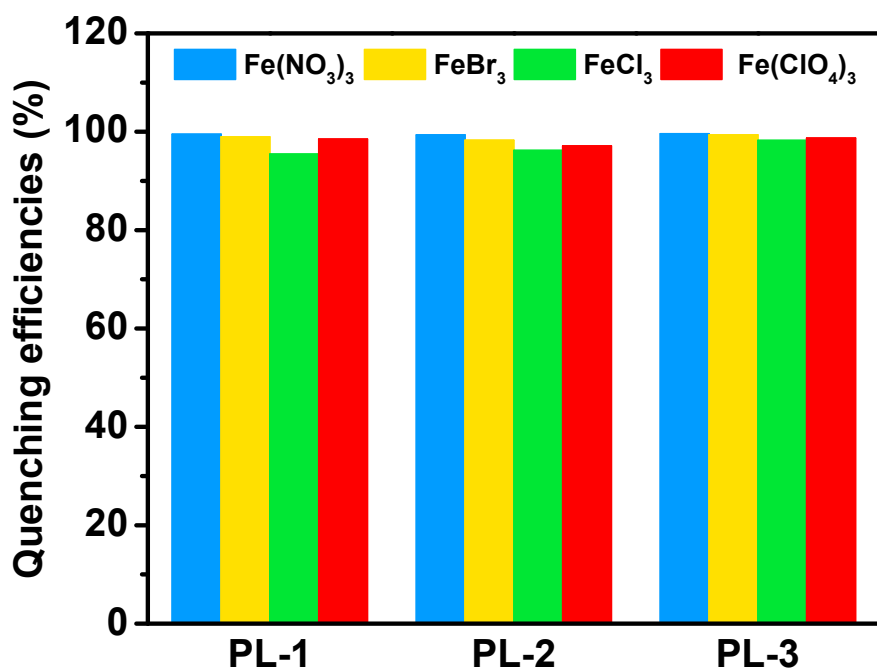

**Fig. S3** The comparison of the quenching efficiency of PL-1, PL-2, and PL-3 dispersed in EtOH upon the addition of 400 μL of various anions of Fe<sup>3+</sup> solutions (10 mM).

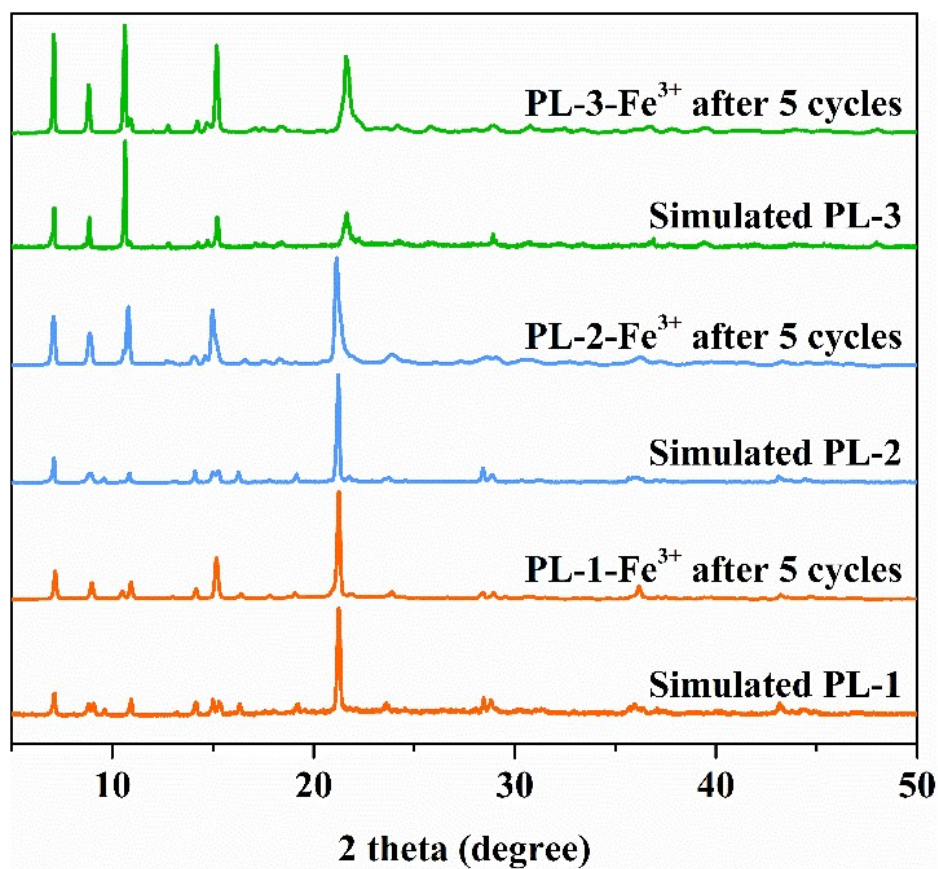

**Fig. S4** PXRD patterns of PL-1, PL-2, and PL-3 after 5 cycles for sensing Fe<sup>3+</sup> ions.

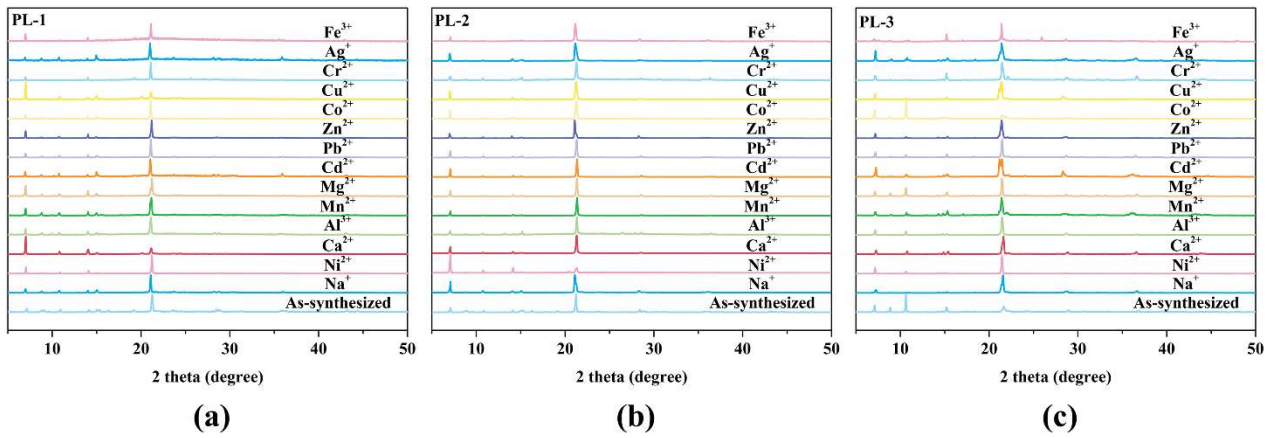

Fig. S5 PXRD patterns of PL-1 (a), PL-2 (b), and PL-3 (c) after being soaked in different metal solutions.

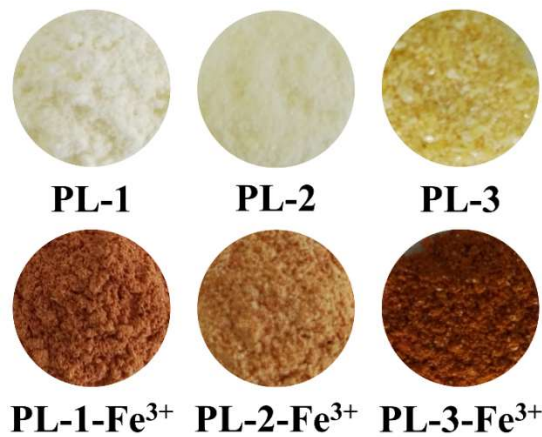

Fig. S6 Photographs of PL-1, PL-2, PL-3 and Fe<sup>3+</sup> incorporated PL-1, PL-2, PL-3.

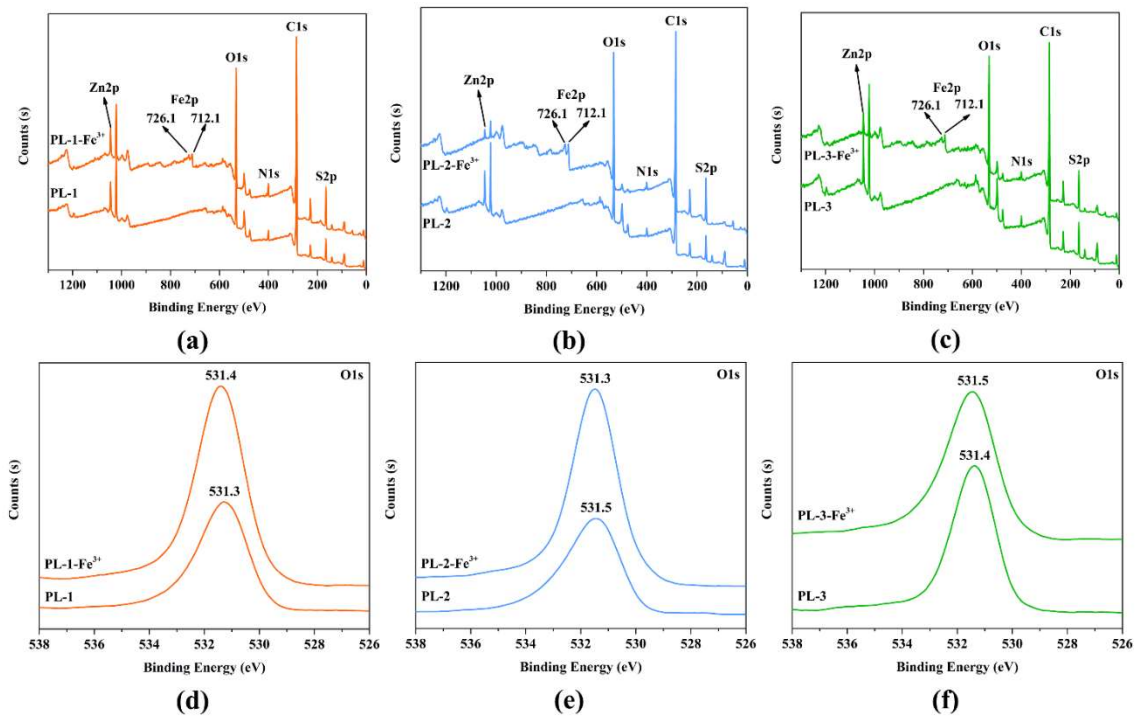

Fig. S7 XPS survey (a, b, c) and O1s XPS spectra (d, e, f) of PL-1, PL-2, and PL-3 before and after being immersed in EtOH solutions of Fe(NO<sub>3</sub>)<sub>3</sub>.

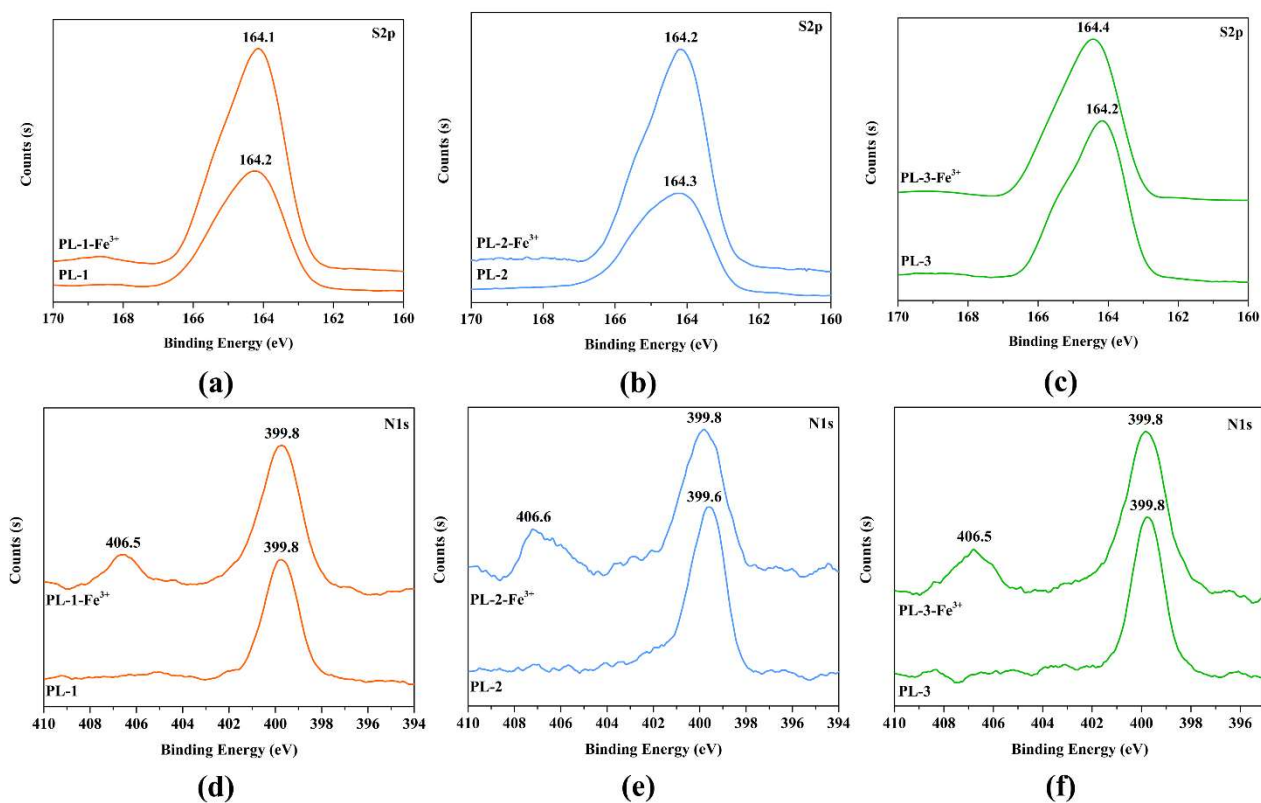

**Fig. S8** S2p (a, b, c) and N1s (d, e, f) XPS spectra of **PL-1**, **PL-2**, and **PL-3** before and after being immersed in EtOH solutions of Fe(NO<sub>3</sub>)<sub>3</sub>.

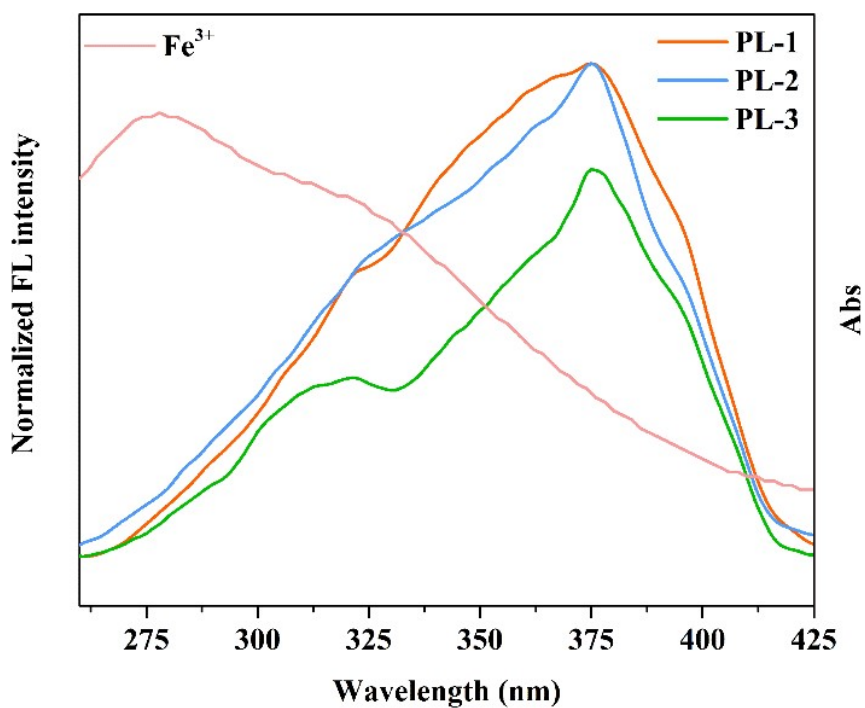

**Fig. S9** Excitation spectra of **PL-1**, **PL-2**, and **PL-3** dispersed in EtOH and UV-vis absorption spectrum of Fe<sup>3+</sup> ions in EtOH.

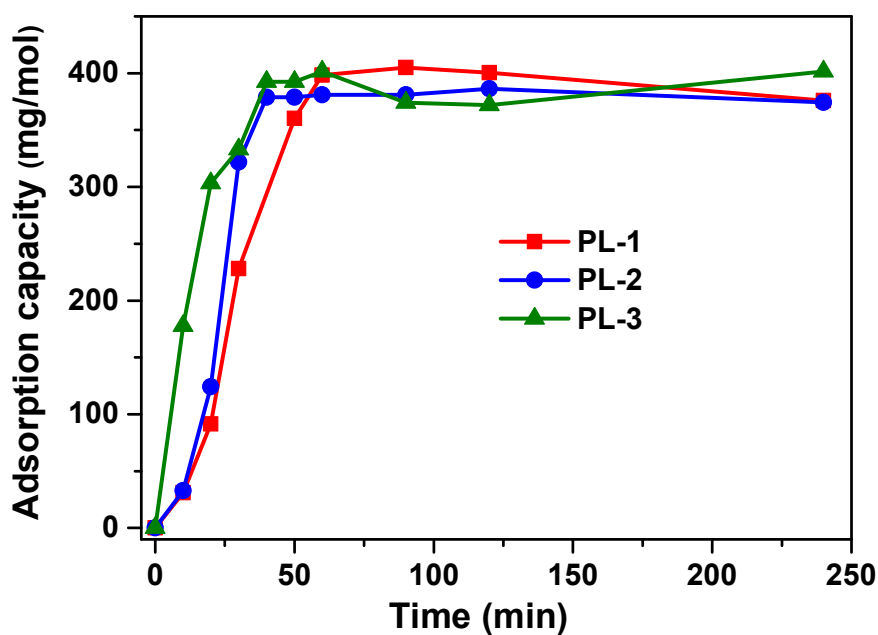

**Fig. S10** Plots of adsorption capacities of  $\text{Fe}^{3+}$  ions vs. the adsorption time for **PL-1**, **PL-2**, and **PL-3**. The saturated adsorption capacity for  $\text{Fe}^{3+}$  ions is comparable for **PL-1**, **PL-2** and **PL-3** with *ca.* 376, 374, and 402 mg/mol at 4 h, respectively. The adsorption rate (from the slope for this curve) below 30 min obviously follows the order: **PL-3** > **PL-2** > **PL-1**.

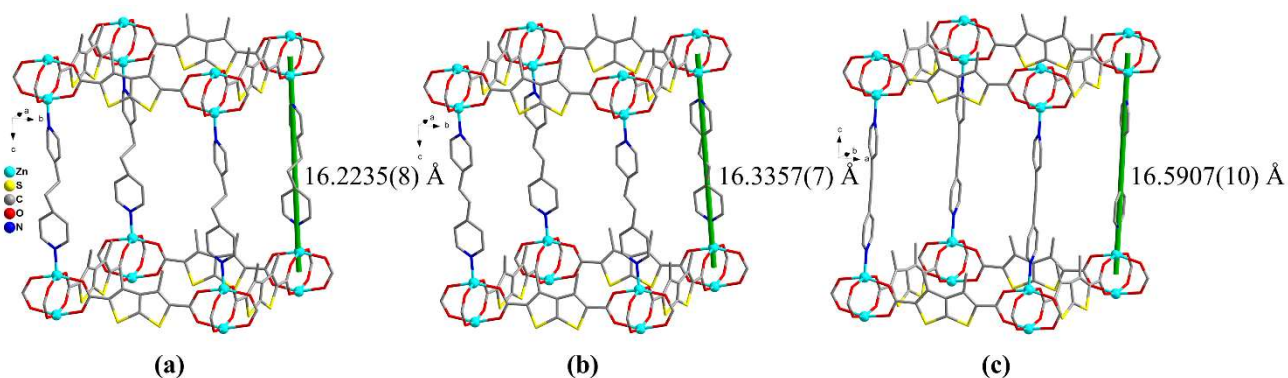

**Fig. S11** Lengths of pillar for **PL-1** (a), **PL-2** (b), and **PL-3** (c).

**Table S1** Summary of the values of  $K_{SV}$  for the fluorescent MOFs used for sensing  $Fe^{3+}$  ions.

| Fluorescent MOF materials                                              | Media            | $K_{SV}$ ( $M^{-1}$ ) | Ref.      |
|------------------------------------------------------------------------|------------------|-----------------------|-----------|
| $\{[Cd_2(bptc)(2,2'-bipy)_2(H_2O)_2]\}_n$                              | H <sub>2</sub> O | $8.61 \times 10^3$    | S1        |
| $\{[Cd_2(bptc)(phen)_2] \cdot 4H_2O\}_n$                               | H <sub>2</sub> O | $3.07 \times 10^3$    | S1        |
| $\{[Cd_2(bptc)(4,4'-bipy)(H_2O)_2] \cdot 4H_2O\}_n$                    | H <sub>2</sub> O | $6.21 \times 10^3$    | S1        |
| $[Zn_2(trz)_2(btdb)] \cdot 4DMF$                                       | H <sub>2</sub> O | $2.4 \times 10^2$     | S2        |
| $[Cd_{1.5}(L)_2(bpy)(NO_3)]$                                           | H <sub>2</sub> O | $1.13 \times 10^4$    | S3        |
| $[Eu(BCB)(DMF)] \cdot (DMF)_{1.5}(H_2O)_2$                             | H <sub>2</sub> O | $2.35 \times 10^4$    | S4        |
| $[Zn(DHT)(BPP)]_n$                                                     | H <sub>2</sub> O | $1.77 \times 10^4$    | S5        |
| $[Cd_{1.5}(L)_2(bpy)(NO_3)]$                                           | H <sub>2</sub> O | $1.91 \times 10^4$    | S6        |
| $[Eu_2(L)_3(DMF)_2(H_2O)_4] \cdot 2DMF$                                | H <sub>2</sub> O | $8.31 \times 10^3$    | S7        |
| $[Tb_2(L)_3(DMF)_2(H_2O)_4] \cdot 2DMF$                                | H <sub>2</sub> O | $5.63 \times 10^3$    | S7        |
| $[Gd_2(L)_3(DMF)_2(H_2O)_4] \cdot 2DMF$                                | H <sub>2</sub> O | $2.86 \times 10^4$    | S7        |
| $[Y_2(L)_3(DMF)_2(H_2O)_4] \cdot 2DMF$                                 | H <sub>2</sub> O | $1.50 \times 10^4$    | S7        |
| $[Co_6(oba)_4(Hatz)(atz)(H_2O)_2(\mu_3-OH)_2(\mu_2-OH)] \cdot H_2O$    | H <sub>2</sub> O | $9.61 \times 10^4$    | S8        |
| UiO-67                                                                 | H <sub>2</sub> O | $5.981 \times 10^4$   | S9        |
| UiO-67@N                                                               | H <sub>2</sub> O | $5.252 \times 10^4$   | S9        |
| UiO-67@NN                                                              | H <sub>2</sub> O | $1.646 \times 10^4$   | S9        |
| $\{[Zn_4(tpta)_2(OH)_2(bib)_4] \cdot H_2O\}_n$                         | H <sub>2</sub> O | $7.8 \times 10^3$     | S10       |
| JLUMOF201-Y                                                            | H <sub>2</sub> O | $7.67 \times 10^3$    | S11       |
| JLUMOF201-Tb                                                           | H <sub>2</sub> O | $8.38 \times 10^3$    | S11       |
| $\{[H_2N(Me)_2]_2[Zn_5(L)_2(OH)_2] \cdot 3DMF \cdot 4H_2O\}_n$         | H <sub>2</sub> O | $9.799 \times 10^4$   | S12       |
| $[Zn_2(trz)_2(btdb)] \cdot 4DMF$                                       | MeOH             | $3.3 \times 10^3$     | S2        |
| $[Eu_2(TDC)_3(CH_3OH)_2(CH_3OH)]$                                      | MeOH             | $3.42 \times 10^3$    | S13       |
| $[Tb_2(TDC)_3(CH_3OH)_2(CH_3OH)]$                                      | MeOH             | $3.04 \times 10^4$    | S13       |
| $[Cd_2(L1)(tdc)_2(H_2O)]_n$                                            | EtOH             | $3.01 \times 10^3$    | S14       |
| $[Cd(L2)_{0.5}(tdc)]_n$                                                | EtOH             | $4.22 \times 10^3$    | S14       |
| Tb <sup>3+</sup> @Zn-MOF                                               | EtOH             | $3.26 \times 10^4$    | S15       |
| $CH_3-dpb)_2[Mg_3(1,4-NDC)_4(\mu-H_2O)_2(CH_3OH)(H_2O)] \cdot 1.5H_2O$ | EtOH             | $1.6 \times 10^4$     | S16       |
| $[La(TPT)(DMSO)_2] \cdot H_2O$                                         | EtOH             | $1.36 \times 10^4$    | S17       |
| EuL <sub>3</sub>                                                       | EtOH             | $4.1 \times 10^3$     | S18       |
| $[Eu_2K_2(dcpa)_2(H_2O)_6] \cdot 5H_2O$                                | EtOH             | $4.30 \times 10^4$    | S19       |
| $[Eu_3(FDA)_4(DMSO)_2(NO_3)(H_2O)_2]_n$                                | EtOH             | $3.3 \times 10^4$     | S20       |
| PL-1                                                                   | EtOH             | $1.58 \times 10^4$    | This work |
| PL-2                                                                   | EtOH             | $1.72 \times 10^4$    | This work |
| PL-3                                                                   | EtOH             | $2.47 \times 10^4$    | This work |



**Table S2** List of the structure parameters and  $K_{SV}$  for the pillar-layered MOFs.

| MOFs | Dipyridyl ligand                                                                         | Length of the pillar (Å) | Pore volume (%) | $K_{SV}$ (M <sup>-1</sup> ) |
|------|------------------------------------------------------------------------------------------|--------------------------|-----------------|-----------------------------|
| PL-1 | 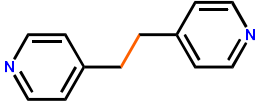<br>bpe | 16.2235(8)               | 45.5            | 1.60 x 10 <sup>4</sup>      |
| PL-2 | <br>dpe | 16.3357(7)               | 45.7            | 1.73 x 10 <sup>4</sup>      |
| PL-3 | <br>bpa | 16.5907(10)              | 46.0            | 2.52 x 10 <sup>4</sup>      |

## References

- S1. Y. Lin, X. Zhang, W. Chen, W. Shi and P. Cheng, *Inorg. Chem.*, 2017, **56**, 11768-11778.
- S2. X.-T. Hu, Z. Yin, X.-P. Luo, C.-H. Shen and M.-H. Zeng, *Inorg. Chem. Commun.*, 2021, **129**, 108664.
- S3. M. Singh, S. Senthilkumar, S. Rajput and S. Neogi, *Inorg. Chem.*, 2020, **59**, 3012-3025.
- S4. M. Y. Zhang, F. Y. Yi, L. J. Liu, G. P. Yan, H. Liu and J. F. Guo, *Dalton Trans.*, 2021, **50**, 15593-15601.
- S5. S. T. Wang, X. Zheng, S. H. Zhang, G. Z. Li and Y. Xiao, *CrystEngComm*, 2021, **23**, 4059-4068.
- S6. M. Singh, G. Kumar and S. Neogi, *Front. Chem.*, 2021, **9**, 651866.
- S7. L. J. Zhao, B. Li and G. P. Yong, *CrystEngComm*, 2023, **25**, 2813-2823.
- S8. W. S. Zhang, G. Q. Wang, Y. X. Wang, Y. L. Yang, X. Bai, H. Cui, Y. Lu and S. X. Liu, *Dalton Trans.*, 2023, **52**, 4407-4414.
- S9. S. Fajal, W. Mandal, D. Majumder, M. M. Shirolkar, Y. D. More and S. K. Ghosh, *Chem. Eur. J.*, 2022, **28**, e202104175.
- S10. D. Qi, X. Si, L. Guo, Z. Yan, C. Shao and L. Yang, *Colloid and Surfaces A*, 2022, **649**, 129477.
- S11. Q. Hu, T. Xu, J. Gu, L. Zhang and Y. Liu, *CrystEngComm*, 2022, **24**, 2759-2766.
- S12. Y.-T. Yan, Y.-L. Wu, L.-N. Zheng, W. Cai, P.-F. Tang, W.-P. Wu, W.-Y. Zhang and Y.-Y. Wang, *New J. Chem.*,

- 2022, **46**, 4292–4299.
- S13. K. Xu, F. Wang, S. Huang, Z. Yu, J. Zhang, J. Yu, H. Gao, Y. Fu, X Li, Y. Zhao, *RSC Adv.*, 2016, **6**, 91741-91747.
- S14. Y. Q. Su, L. Fu and G. H. Cui, *Dalton Trans.*, 2021, **50**, 15743-15753.
- S15. Y.-J. Liang, J. Yao, M. Deng, Y.-E. Liu, Q.-Q. Xu, Q.-X. Li, B. Jing, A.-X. Zhu and B. Huang, *CrystEngComm*, 2021, **23**, 7348-7357.
- S16. Z. F. Wu, L. K. Gong and X. Y. Huang, *Inorg. Chem.*, 2017, **56**, 7397-7403.
- S17. C. Zhang, Y. Yan, Q. Pan, L. Sun, H. He, Y. Liu, Z. Liang J. Li, *Dalton Trans.*, 2015, **44**, 13340 -13346.
- S18. M. Zheng, H. Tan, Z. Xie, L. Zhang, X. Jing Z. Sun, *ACS Appl. Mater. Interfaces*. 2013, **5**, 1078-1083.
- S19. H. Zhang, R. Fan, W. Chen, J. Fan, Y. Dong, Y. Song, X. Du, P. Wang, Y. Yang, *Cryst. Growth Des.* 2016, **16**, 5429-5440.
- S20. H. Zhang, G.-Y. Liu, X.-H. Diao, Y. Muhammad, C. Chen, Y.-Y. Gao, H. Wang, C.-S. Qi, W. Li, *J. Solid State Chem.*, 2023, **324**, 124114.
